# Supplementary material for: Ecological risk assessment of future suitable areas for Piper kadsura under the background of climate change
Source: Front Plant Sci. 2025 Jan 20;15:1471706. doi: 10.3389/fpls.2024.1471706 (PMC11788358; doi:10.3389/fpls.2024.1471706)
Supplement: Supplementary file 2 [file Table1.xlsx]

## Sheet: Supplementary Table 1
Supplementary Table 1. Distribution information of all Piper kadsura points collected in this study (303 samples).
Serial number	Species name	Location	Longitude(E)	Latitude (N)	Information Source (Platform)	Website
S1	Piper kadsura	Wanshan County, Tongren City, Guizhou Province, China ‌	109.160316	27.677	National Specimen Information Infrastructure	http://www.nsii.org.cn/2017/specimen.php?id=20005714
S2	Piper kadsura	Wanshan County, Tongren City, Guizhou Province, China ‌	109.160316	27.677	National Specimen Information Infrastructure	http://www.nsii.org.cn/2017/specimen.php?id=20005715
S3	Piper kadsura	Among the trees of Zhongfeng Temple in Emei, Sichuan Province, China ‌	103.412838	29.5742	National Specimen Information Infrastructure	http://www.nsii.org.cn/2017/specimen.php?id=19879139
S4	Piper kadsura	Zhujiajian Street, Putuo District, Zhoushan City, Zhejiang Province, China ‌	122.4	29.9233	National Specimen Information Infrastructure	http://www.nsii.org.cn/2017/specimen.php?id=19849824
S5	Piper kadsura	Putuo Mountain, Zhoushan City, Zhejiang Province, China ‌	122.398	30.008	National Specimen Information Infrastructure	http://www.nsii.org.cn/2017/specimen.php?id=18421832
S6	Piper kadsura	Putuo Mountain, Zhoushan City, Zhejiang Province, China ‌	122.398	30.008	National Specimen Information Infrastructure	http://www.nsii.org.cn/2017/specimen.php?id=18421836
S7	Piper kadsura	Putuo Mountain, Zhoushan City, Zhejiang Province, China ‌	122.398	30.008	National Specimen Information Infrastructure	http://www.nsii.org.cn/2017/specimen.php?id=18421835
S8	Piper kadsura	Putuo Mountain, Zhoushan City, Zhejiang Province, China ‌	122.398	30.008	National Specimen Information Infrastructure	http://www.nsii.org.cn/2017/specimen.php?id=18421834
S9	Piper kadsura	Putuo Mountain, Zhoushan City, Zhejiang Province, China ‌	122.398	30.008	National Specimen Information Infrastructure	http://www.nsii.org.cn/2017/specimen.php?id=18421833
S10	Piper kadsura	Putuo Mountain Golden Beach, Zhejiang Province, China ‌	122.397	29.9845	National Specimen Information Infrastructure	http://www.nsii.org.cn/2017/specimen.php?id=16108245
S11	Piper kadsura	Putuo Mountain Golden Beach, Zhejiang Province, China ‌	122.397	29.9845	National Specimen Information Infrastructure	http://www.nsii.org.cn/2017/specimen.php?id=16108238
S12	Piper kadsura	Vegetable fields in Huiji Temple, Putuo Mountain, Zhejiang Province, China ‌	122.397	30.017	National Specimen Information Infrastructure	http://www.nsii.org.cn/2017/specimen.php?id=16108246
S13	Piper kadsura	Vegetable garden of Huiji Temple, Putuo Mountain, Zhejiang Province, China ‌	122.397	30.017	National Specimen Information Infrastructure	http://www.nsii.org.cn/2017/specimen.php?id=16108243
S14	Piper kadsura	Vegetable garden of Huiji Temple, Putuo Mountain, Zhejiang Province, China ‌	122.397	30.017	National Specimen Information Infrastructure	http://www.nsii.org.cn/2017/specimen.php?id=16108242
S15	Piper kadsura	Vegetable garden of Huiji Temple, Putuo Mountain, Zhejiang Province, China ‌	122.397	30.017	National Specimen Information Infrastructure	http://www.nsii.org.cn/2017/specimen.php?id=16108241
S16	Piper kadsura	Vegetable garden of Huiji Temple, Putuo Mountain, Zhejiang Province, China ‌	122.397	30.017	National Specimen Information Infrastructure	http://www.nsii.org.cn/2017/specimen.php?id=16108229
S17	Piper kadsura	Vegetable garden of Huiji Temple, Putuo Mountain, Zhejiang Province, China ‌	122.397	30.017	National Specimen Information Infrastructure	http://www.nsii.org.cn/2017/specimen.php?id=16108239
S18	Piper kadsura	Both sides of the road in Putuo Buddha Ding Mountain, Zhejiang Province, China ‌	122.397	30.0161	National Specimen Information Infrastructure	http://www.nsii.org.cn/2017/specimen.php?id=16108248
S19	Piper kadsura	Zhejiang Putuo county Foding mountain, China ‌	122.397	30.0161	National Specimen Information Infrastructure	http://www.nsii.org.cn/2017/specimen.php?id=16108247
S20	Piper kadsura	Both sides of the road in Putuo Buddha Ding Mountain, Zhejiang Province, China ‌	122.397	30.0161	National Specimen Information Infrastructure	http://www.nsii.org.cn/2017/specimen.php?id=16108244
S21	Piper kadsura	Putuo Mountain, Zhejiang Province, China ‌	122.397	30.0161	National Specimen Information Infrastructure	http://www.nsii.org.cn/2017/specimen.php?id=16108240
S22	Piper kadsura	Putuo Island, Putuo District, Zhoushan City, Zhejiang Province, China ‌	122.396	30.0062	National Specimen Information Infrastructure	http://www.nsii.org.cn/2017/specimen.php?id=15000048
S23	Piper kadsura	Putuo Island, Putuo District, Zhoushan City, Zhejiang Province, China ‌	122.396	30.0062	National Specimen Information Infrastructure	http://www.nsii.org.cn/2017/specimen.php?id=16886159
S24	Piper kadsura	Taohua Island, Putuo, Zhoushan City, Zhejiang Province, China ‌	122.283	29.8206	National Specimen Information Infrastructure	http://www.nsii.org.cn/2017/specimen.php?id=18421837
S25	Piper kadsura	Hualien County, Taiwan Province, China ‌	121.605	23.9767	National Specimen Information Infrastructure	http://www.nsii.org.cn/2017/specimen.php?id=2364165
S26	Piper kadsura	Yangming Mountain, Taipei City, Taiwan Province, China ‌	121.565	25.1498	National Specimen Information Infrastructure	http://www.nsii.org.cn/2017/specimen.php?id=15154152
S27	Piper kadsura	Yangming Mountain, Taipei City, Taiwan Province, China ‌	121.565	25.1498	National Specimen Information Infrastructure	http://www.nsii.org.cn/2017/specimen.php?id=15154153
S28	Piper kadsura	Taipei, Taiwan Province, China ‌	121.505	25.0471	National Specimen Information Infrastructure	http://www.nsii.org.cn/2017/specimen.php?id=2358883
S29	Piper kadsura	Taipei, Taiwan Province, China ‌	121.505	25.0471	National Specimen Information Infrastructure	http://www.nsii.org.cn/2017/specimen.php?id=2361999
S30	Piper kadsura	Taipei, Taiwan Province, China ‌	121.505	25.0471	National Specimen Information Infrastructure	http://www.nsii.org.cn/2017/specimen.php?id=4783879
S31	Piper kadsura	Putuo District, Shanghai, China ‌	121.391	31.2514	National Specimen Information Infrastructure	http://www.nsii.org.cn/2017/specimen.php?id=2541206
S32	Piper kadsura	Putuo District, Shanghai, China ‌	121.391	31.2514	National Specimen Information Infrastructure	http://www.nsii.org.cn/2017/specimen.php?id=2412067
S33	Piper kadsura	Putuo District, Shanghai, China ‌	121.391	31.2514	National Specimen Information Infrastructure	http://www.nsii.org.cn/2017/specimen.php?id=2541207
S34	Piper kadsura	Taoyuan County, Taiwan Province, China ‌	121.297	24.9963	National Specimen Information Infrastructure	http://www.nsii.org.cn/2017/specimen.php?id=6551223
S35	Piper kadsura	Dongtou County, Wenzhou City, Zhejiang Province, China ‌	121.153	27.8395	National Specimen Information Infrastructure	http://www.nsii.org.cn/2017/specimen.php?id=15003892
S36	Piper kadsura	Taitung County, Taiwan Province, China ‌	121.147	22.758	National Specimen Information Infrastructure	http://www.nsii.org.cn/2017/specimen.php?id=6551221
S37	Piper kadsura	Taitung County, Taiwan Province, China ‌	121.147	22.758	National Specimen Information Infrastructure	http://www.nsii.org.cn/2017/specimen.php?id=6551222
S38	Piper kadsura	Taitung County, Taiwan Province, China ‌	121.147	22.758	National Specimen Information Infrastructure	http://www.nsii.org.cn/2017/specimen.php?id=6551220
S39	Piper kadsura	Taitung County, Taiwan Province, China ‌	121.147	22.758	National Specimen Information Infrastructure	http://www.nsii.org.cn/2017/specimen.php?id=4783933
S40	Piper kadsura	Guanyin Cave, Yandang Mountain, Yueqing City, Zhejiang Province, China ‌	121.117	28.3852	National Specimen Information Infrastructure	http://www.nsii.org.cn/2017/specimen.php?id=15597298
S41	Piper kadsura	Tiantai County, Zhejiang Province, China ‌	121.002	29.1473	National Specimen Information Infrastructure	http://www.nsii.org.cn/2017/specimen.php?id=2259457
S42	Piper kadsura	Tiantai County, Zhejiang Province, China ‌	121.002	29.1473	National Specimen Information Infrastructure	http://www.nsii.org.cn/2017/specimen.php?id=2541204
S43	Piper kadsura	Hsinchu County, Taiwan Province, China ‌	120.935	24.7429	National Specimen Information Infrastructure	http://www.nsii.org.cn/2017/specimen.php?id=6139875
S44	Piper kadsura	Miaoli County, Taiwan Province, China ‌	120.817	24.5673	National Specimen Information Infrastructure	http://www.nsii.org.cn/2017/specimen.php?id=4784182
S45	Piper kadsura	Miaoli County, Taiwan Province, China ‌	120.817	24.5673	National Specimen Information Infrastructure	http://www.nsii.org.cn/2017/specimen.php?id=6139874
S46	Piper kadsura	Nantou County, Taiwan Province, China ‌	120.687	23.9046	National Specimen Information Infrastructure	http://www.nsii.org.cn/2017/specimen.php?id=6551219
S47	Piper kadsura	Nantou County, Taiwan Province, China ‌	120.652	23.65	National Specimen Information Infrastructure	http://www.nsii.org.cn/2017/specimen.php?id=6139876
S48	Piper kadsura	Nantou County, Taiwan Province, China ‌	120.652	23.65	National Specimen Information Infrastructure	http://www.nsii.org.cn/2017/specimen.php?id=4783880
S49	Piper kadsura	Pingyang County, Zhejiang Province, China ‌	120.573	27.6677	National Specimen Information Infrastructure	http://www.nsii.org.cn/2017/specimen.php?id=15597295
S50	Piper kadsura	Pingyang County, Zhejiang Province, China ‌	120.561	27.6657	National Specimen Information Infrastructure	http://www.nsii.org.cn/2017/specimen.php?id=2406632
S51	Piper kadsura	Pingyang County, Zhejiang Province, China ‌	120.561	27.6657	National Specimen Information Infrastructure	http://www.nsii.org.cn/2017/specimen.php?id=2362001
S52	Piper kadsura	Pingyang County, Zhejiang Province, China ‌	120.561	27.6657	National Specimen Information Infrastructure	http://www.nsii.org.cn/2017/specimen.php?id=2352392
S53	Piper kadsura	Pingyang County, Zhejiang Province, China ‌	120.561	27.6657	National Specimen Information Infrastructure	http://www.nsii.org.cn/2017/specimen.php?id=2406644
S54	Piper kadsura	Pingyang County, Zhejiang Province, China ‌	120.561	27.6657	National Specimen Information Infrastructure	http://www.nsii.org.cn/2017/specimen.php?id=2389045
S55	Piper kadsura	Pingyang County, Zhejiang Province, China ‌	120.561	27.6657	National Specimen Information Infrastructure	http://www.nsii.org.cn/2017/specimen.php?id=2541205
S56	Piper kadsura	Pingtung County, Taiwan Province, China ‌	120.484	22.6861	National Specimen Information Infrastructure	http://www.nsii.org.cn/2017/specimen.php?id=3787310
S57	Piper kadsura	Baihe District, Tainan City, Taiwan Province, China ‌	120.426	23.3572	National Specimen Information Infrastructure	http://www.nsii.org.cn/2017/specimen.php?id=18421831
S58	Piper kadsura	Fuding County Ningde City, Fujian Province, China ‌	120.223	27.3305	National Specimen Information Infrastructure	http://www.nsii.org.cn/2017/specimen.php?id=17768288
S59	Piper kadsura	Yacheng town Xiapu County, Fujian Province, China ‌	120.201	26.9867	National Specimen Information Infrastructure	http://www.nsii.org.cn/2017/specimen.php?id=17768275
S60	Piper kadsura	Yacheng town Xiapu County, Fujian Province, China ‌	120.201	26.9867	National Specimen Information Infrastructure	http://www.nsii.org.cn/2017/specimen.php?id=17768268
S61	Piper kadsura	Yacheng town Xiapu County, Fujian Province, China ‌	120.201	26.9867	National Specimen Information Infrastructure	http://www.nsii.org.cn/2017/specimen.php?id=17768306
S62	Piper kadsura	Yacheng town Xiapu County, Fujian Province, China ‌	120.201	26.9867	National Specimen Information Infrastructure	http://www.nsii.org.cn/2017/specimen.php?id=17768282
S63	Piper kadsura	Yacheng town Xiapu County, Fujian Province, China ‌	120.201	26.9867	National Specimen Information Infrastructure	http://www.nsii.org.cn/2017/specimen.php?id=17768280
S64	Piper kadsura	Yacheng town Xiapu County, Fujian Province, China ‌	120.201	26.9867	National Specimen Information Infrastructure	http://www.nsii.org.cn/2017/specimen.php?id=17768273
S65	Piper kadsura	Tainan City, Taiwan Province, China ‌	120.196	22.9926	National Specimen Information Infrastructure	http://www.nsii.org.cn/2017/specimen.php?id=4783935
S66	Piper kadsura	Tainan City, Taiwan Province, China ‌	120.196	22.9942	National Specimen Information Infrastructure	http://www.nsii.org.cn/2017/specimen.php?id=4784132
S67	Piper kadsura	Xikeng Village, Shimen She Nationality Township, Xiapu County, Ningde City, Fujian Province, China ‌	120.082	26.9745	National Specimen Information Infrastructure	http://www.nsii.org.cn/2017/specimen.php?id=17768279
S68	Piper kadsura	Xikeng Village, Shimen She Nationality Township, Xiapu County, Ningde City, Fujian Province, China ‌	120.082	26.9745	National Specimen Information Infrastructure	http://www.nsii.org.cn/2017/specimen.php?id=17768285
S69	Piper kadsura	Xiapu County, Ningde City, Fujian Province, China ‌	120.011	26.8913	National Specimen Information Infrastructure	http://www.nsii.org.cn/2017/specimen.php?id=17768289
S70	Piper kadsura	Xiapu County, Ningde City, Fujian Province, China ‌	120.011	26.8913	National Specimen Information Infrastructure	http://www.nsii.org.cn/2017/specimen.php?id=17768281
S71	Piper kadsura	Zherong County, Ningde City, Fujian Province, China ‌	119.907	27.24	National Specimen Information Infrastructure	http://www.nsii.org.cn/2017/specimen.php?id=17768269
S72	Piper kadsura	Half Moon Village, Xinan Town, Xiapu County, Fujian Province, China ‌	119.896	26.7566	National Specimen Information Infrastructure	http://www.nsii.org.cn/2017/specimen.php?id=17768278
S73	Piper kadsura	Half Moon Village, Xinan Town, Xiapu County, Fujian Province, China ‌	119.896	26.7566	National Specimen Information Infrastructure	http://www.nsii.org.cn/2017/specimen.php?id=17768270
S74	Piper kadsura	Half Moon Village, Xinan Town, Xiapu County, Fujian Province, China ‌	119.896	26.7566	National Specimen Information Infrastructure	http://www.nsii.org.cn/2017/specimen.php?id=17768284
S75	Piper kadsura	Qiyang Village, Xibian Town, Fuan City, Ningde City, Fujian Province, China ‌	119.785	27.0189	National Specimen Information Infrastructure	http://www.nsii.org.cn/2017/specimen.php?id=17768274
S76	Piper kadsura	Lin 'an District, Hangzhou City, Zhejiang Province, China ‌	119.73	30.2408	National Specimen Information Infrastructure	http://www.nsii.org.cn/2017/specimen.php?id=2259458
S77	Piper kadsura	Taishun County, Wenzhou City, Zhejiang Province, China ‌	119.713	27.5598	National Specimen Information Infrastructure	http://www.nsii.org.cn/2017/specimen.php?id=2373250
S78	Piper kadsura	Taishun County, Wenzhou City, Zhejiang Province, China ‌	119.713	27.5598	National Specimen Information Infrastructure	http://www.nsii.org.cn/2017/specimen.php?id=6551236
S79	Piper kadsura	Taishun County, Wenzhou City, Zhejiang Province, China ‌	119.713	27.5598	National Specimen Information Infrastructure	http://www.nsii.org.cn/2017/specimen.php?id=2402526
S80	Piper kadsura	Taishun County, Wenzhou City, Zhejiang Province, China ‌	119.713	27.5598	National Specimen Information Infrastructure	http://www.nsii.org.cn/2017/specimen.php?id=2412059
S81	Piper kadsura	Fuan City, Fujian Province, China ‌	119.643	27.0917	National Specimen Information Infrastructure	http://www.nsii.org.cn/2017/specimen.php?id=6551235
S82	Piper kadsura	Jingning County, Lishui City, Zhejiang Province, China ‌	119.642	27.9796	National Specimen Information Infrastructure	http://www.nsii.org.cn/2017/specimen.php?id=15597293
S83	Piper kadsura	Yingchuan Town, Jingning County, Lishui City, Zhejiang Province, China ‌	119.326	27.8541	National Specimen Information Infrastructure	http://www.nsii.org.cn/2017/specimen.php?id=15597294
S84	Piper kadsura	Fuzhou, Fujian Province, China ‌	119.303	26.0804	National Specimen Information Infrastructure	http://www.nsii.org.cn/2017/specimen.php?id=2389062
S85	Piper kadsura	Juzhou Village, Hongkou Town, Jiaocheng District, Ningde City, Fujian Province, China ‌	119.288	26.8991	National Specimen Information Infrastructure	http://www.nsii.org.cn/2017/specimen.php?id=15597252
S86	Piper kadsura	Suichang County, Zhejiang Province, China ‌	119.271	28.5956	National Specimen Information Infrastructure	http://www.nsii.org.cn/2017/specimen.php?id=2392174
S87	Piper kadsura	Chun 'an County, Zhejiang Province, China ‌	119.045	29.6113	National Specimen Information Infrastructure	http://www.nsii.org.cn/2017/specimen.php?id=2352404
S88	Piper kadsura	Baoyan Village, Zhenqian Town, Zhenghe County, Nanping City, Fujian Province, China ‌	119.007	27.2766	National Specimen Information Infrastructure	http://www.nsii.org.cn/2017/specimen.php?id=17768277
S89	Piper kadsura	Yanping County, Fujian Province, China ‌	118.177	26.6408	National Specimen Information Infrastructure	http://www.nsii.org.cn/2017/specimen.php?id=4611546
S90	Piper kadsura	Tingxi Township, Tongan County, Fujian Province, China ‌	118.137	24.7947	National Specimen Information Infrastructure	http://www.nsii.org.cn/2017/specimen.php?id=17768286
S91	Piper kadsura	Tingxi Township, Tongan County, Fujian province, China ‌	118.137	24.7947	National Specimen Information Infrastructure	http://www.nsii.org.cn/2017/specimen.php?id=17768272
S92	Piper kadsura	Jianyang District, Nanping City, Fujian Province, China ‌	118.128	27.3375	National Specimen Information Infrastructure	http://www.nsii.org.cn/2017/specimen.php?id=6551229
S93	Piper kadsura	Wuyi Mountain in Fujian Province, China ‌	118.042	27.7626	National Specimen Information Infrastructure	http://www.nsii.org.cn/2017/specimen.php?id=15192118
S94	Piper kadsura	Chong 'an County, Jiangsu Province, China ‌	118.026	27.7543	National Specimen Information Infrastructure	http://www.nsii.org.cn/2017/specimen.php?id=2364166
S95	Piper kadsura	Chong 'an County, Jiangsu Province, China ‌	118.026	27.7543	National Specimen Information Infrastructure	http://www.nsii.org.cn/2017/specimen.php?id=2357123
S96	Piper kadsura	Chong 'an County, Jiangsu Province, China ‌	118.026	27.7543	National Specimen Information Infrastructure	http://www.nsii.org.cn/2017/specimen.php?id=6551232
S97	Piper kadsura	Chong 'an County, Jiangsu Province, China ‌	118.026	27.7543	National Specimen Information Infrastructure	http://www.nsii.org.cn/2017/specimen.php?id=6551230
S98	Piper kadsura	Chong 'an County, Jiangsu Province, China ‌	118.026	27.7543	National Specimen Information Infrastructure	http://www.nsii.org.cn/2017/specimen.php?id=6551228
S99	Piper kadsura	Chong 'an County, Jiangsu Province, China ‌	118.026	27.7543	National Specimen Information Infrastructure	http://www.nsii.org.cn/2017/specimen.php?id=6551231
S100	Piper kadsura	Tianyou Peak, Wuyishan Scenic Area, Wuyishan City, Fujian Province, China ‌	117.959	27.6561	National Specimen Information Infrastructure	http://www.nsii.org.cn/2017/specimen.php?id=19694612
S101	Piper kadsura	Star Village, Wuyi Mountain city, Nanping City, Fujian Province, China ‌	117.932	27.6401	National Specimen Information Infrastructure	http://www.nsii.org.cn/2017/specimen.php?id=20323783
S102	Piper kadsura	Wuyuan County, Shangrao City, Jiangxi Province, China ‌	117.87	29.2515	National Specimen Information Infrastructure	http://www.nsii.org.cn/2017/specimen.php?id=19690288
S103	Piper kadsura	Wuyuan County, Shangrao City, Jiangxi Province, China ‌	117.868	29.254	National Specimen Information Infrastructure	http://www.nsii.org.cn/2017/specimen.php?id=19690287
S104	Piper kadsura	Qimen County, Anhui Province, China ‌	117.724	29.8604	National Specimen Information Infrastructure	http://www.nsii.org.cn/2017/specimen.php?id=2381098
S105	Piper kadsura	Near Lijiapo, Huangkeng Town, Jianyang City, Fujian Province, China ‌	117.588	27.606	National Specimen Information Infrastructure	http://www.nsii.org.cn/2017/specimen.php?id=20323782
S106	Piper kadsura	Chafu Xianyang logging field and valley, Guangze County, Nanping City, Fujian Province, China ‌	117.431	27.7065	National Specimen Information Infrastructure	http://www.nsii.org.cn/2017/specimen.php?id=17768283
S107	Piper kadsura	Nanjing County, Fujian Province, China ‌	117.352	24.5178	National Specimen Information Infrastructure	http://www.nsii.org.cn/2017/specimen.php?id=15803315
S108	Piper kadsura	Guangze county, Fujian Province, China ‌	117.34	27.5473	National Specimen Information Infrastructure	http://www.nsii.org.cn/2017/specimen.php?id=17768307
S109	Piper kadsura	Letu Area, Huboliao Nature Reserve, Nanjing County, Zhangzhou City, Fujian Province, China ‌	117.23	24.9108	National Specimen Information Infrastructure	http://www.nsii.org.cn/2017/specimen.php?id=19687395
S110	Piper kadsura	Letu Area, Huboliao Nature Reserve, Nanjing County, Zhangzhou City, Fujian Province, China ‌	117.23	24.9108	National Specimen Information Infrastructure	http://www.nsii.org.cn/2017/specimen.php?id=19687396
S111	Piper kadsura	Letu Area, Huboliao Nature Reserve, Nanjing County, Zhangzhou City, Fujian Province, China ‌	117.23	24.9108	National Specimen Information Infrastructure	http://www.nsii.org.cn/2017/specimen.php?id=19687397
S112	Piper kadsura	Letu Area, Huboliao Nature Reserve, Nanjing County, Zhangzhou City, Fujian Province, China ‌	117.23	24.9108	National Specimen Information Infrastructure	http://www.nsii.org.cn/2017/specimen.php?id=19687398
S113	Piper kadsura	Wenyu Village, Shizhong Town, Xinluo District, Longyan City, Fujian Province, China ‌	117.128	24.7936	National Specimen Information Infrastructure	http://www.nsii.org.cn/2017/specimen.php?id=17768271
S114	Piper kadsura	Desheng Pass, Desheng Town, Lichuan County, Jiangxi Province, China ‌	117.024	27.1752	National Specimen Information Infrastructure	http://www.nsii.org.cn/2017/specimen.php?id=15597302
S115	Piper kadsura	Dongzhi County, Anhui Province, China ‌	117.022	30.1136	National Specimen Information Infrastructure	http://www.nsii.org.cn/2017/specimen.php?id=2441317
S116	Piper kadsura	Xiacun Old Brigade, Houshi Town, Luotian District, Longyan City, Fujian Province, China ‌	117.012	25.0786	National Specimen Information Infrastructure	http://www.nsii.org.cn/2017/specimen.php?id=17768287
S117	Piper kadsura	Xiacun Old Brigade, Houshi Town, Luotian District, Longyan City, Fujian Province, China ‌	117.012	25.0786	National Specimen Information Infrastructure	http://www.nsii.org.cn/2017/specimen.php?id=17768276
S118	Piper kadsura	Longyan City, Fujian Province, China ‌	117.012	25.0786	National Specimen Information Infrastructure	http://www.nsii.org.cn/2017/specimen.php?id=6551237
S119	Piper kadsura	Lichuan County, Jiangxi Province, China ‌	116.903	27.2862	National Specimen Information Infrastructure	http://www.nsii.org.cn/2017/specimen.php?id=3787694
S120	Piper kadsura	Nanfeng County, Jiangxi Province, China ‌	116.521	27.2218	National Specimen Information Infrastructure	http://www.nsii.org.cn/2017/specimen.php?id=3787284
S121	Piper kadsura	Dongsha Islands, Guangdong Province, China ‌	116.367	20.8784	National Specimen Information Infrastructure	http://www.nsii.org.cn/2017/specimen.php?id=5064929
S122	Piper kadsura	Dongsha Islands, Guangdong Province, China ‌	116.367	20.8784	National Specimen Information Infrastructure	http://www.nsii.org.cn/2017/specimen.php?id=5064927
S123	Piper kadsura	Bankeng Village, Fucheng Town, Huichang County, Ganzhou City, Jiangxi Province, China ‌	115.934	25.5533	National Specimen Information Infrastructure	http://www.nsii.org.cn/2017/specimen.php?id=15597299
S124	Piper kadsura	Bankeng Village, Fucheng Town, Huichang County, Ganzhou City, Jiangxi Province, China ‌	115.934	25.5533	National Specimen Information Infrastructure	http://www.nsii.org.cn/2017/specimen.php?id=15597301
S125	Piper kadsura	Huichang County, Ganzhou City, Jiangxi Province, China ‌	115.804	25.5903	National Specimen Information Infrastructure	http://www.nsii.org.cn/2017/specimen.php?id=3787388
S126	Piper kadsura	Wuhua County, Guangdong Province, China ‌	115.782	23.9384	National Specimen Information Infrastructure	http://www.nsii.org.cn/2017/specimen.php?id=5064925
S127	Piper kadsura	Yanquan Nature Reserve, Lichuan County, Jiangxi Province, China ‌	115.777	27.2667	National Specimen Information Infrastructure	http://www.nsii.org.cn/2017/specimen.php?id=17934988
S128	Piper kadsura	Yanquan Nature Reserve, Lichuan County, Jiangxi Province, China ‌	115.777	27.2667	National Specimen Information Infrastructure	http://www.nsii.org.cn/2017/specimen.php?id=17934997
S129	Piper kadsura	Xunwu County, Jiangxi Province, China ‌	115.634	24.9725	National Specimen Information Infrastructure	http://www.nsii.org.cn/2017/specimen.php?id=3787412
S130	Piper kadsura	Dayu County, Jiangxi Province, China ‌	114.357	25.4047	National Specimen Information Infrastructure	http://www.nsii.org.cn/2017/specimen.php?id=3787474
S131	Piper kadsura	Jinggangshan City, Jiangxi Province, China ‌	114.296	26.7537	National Specimen Information Infrastructure	http://www.nsii.org.cn/2017/specimen.php?id=19888059
S132	Piper kadsura	Jinggangshan City, Jiangxi Province, China ‌	114.296	26.7537	National Specimen Information Infrastructure	http://www.nsii.org.cn/2017/specimen.php?id=19888058
S133	Piper kadsura	Guangzhou City, Guangdong Province, China ‌	113.271	23.1353	National Specimen Information Infrastructure	http://www.nsii.org.cn/2017/specimen.php?id=4569058
S134	Piper kadsura	Xinyu County, Guangdong Province, China ‌	113.029	22.4613	National Specimen Information Infrastructure	http://www.nsii.org.cn/2017/specimen.php?id=5064911
S135	Piper kadsura	Taishan City, Guangdong Province, China ‌	112.789	22.2548	National Specimen Information Infrastructure	http://www.nsii.org.cn/2017/specimen.php?id=4568912
S136	Piper kadsura	Yunfu County, Guangdong Province, China ‌	112.231	22.7019	National Specimen Information Infrastructure	http://www.nsii.org.cn/2017/specimen.php?id=5064928
S137	Piper kadsura	Xinyi City, Guangdong Province, China ‌	110.942	22.3579	National Specimen Information Infrastructure	http://www.nsii.org.cn/2017/specimen.php?id=5064914
S138	Piper kadsura	Liangshui well, Guban Village, Baisha Town, Yangshuo County, Guilin City, Guangxi Province, China ‌	110.455	24.8514	National Specimen Information Infrastructure	http://www.nsii.org.cn/2017/specimen.php?id=20008174
S139	Piper kadsura	Pingnan County, Guangxi Province, China ‌	110.398	23.5455	National Specimen Information Infrastructure	http://www.nsii.org.cn/2017/specimen.php?id=5064930
S140	Piper kadsura	Keng Zai village, Xuwen County, Guangdong Province, China ‌	110.284	20.2771	National Specimen Information Infrastructure	http://www.nsii.org.cn/2017/specimen.php?id=15597292
S141	Piper kadsura	Luchuan County, Guangxi Province, China ‌	110.271	22.3273	National Specimen Information Infrastructure	http://www.nsii.org.cn/2017/specimen.php?id=5064918
S142	Piper kadsura	Dayaoshan County, Guangxi Province, China ‌	110.124	23.976	National Specimen Information Infrastructure	http://www.nsii.org.cn/2017/specimen.php?id=5064932
S143	Piper kadsura	Bobai County, Guangxi Province, China ‌	109.983	22.2787	National Specimen Information Infrastructure	http://www.nsii.org.cn/2017/specimen.php?id=5064919
S144	Piper kadsura	Huaping Nature Reserve, Longsheng County, Guangxi Province, China ‌	109.92	25.6366	National Specimen Information Infrastructure	http://www.nsii.org.cn/2017/specimen.php?id=16943592
S145	Piper kadsura	Nanren village, Baoli Town, Longsheng County, Guilin City, Guangxi Province, China ‌	109.849	25.8532	National Specimen Information Infrastructure	http://www.nsii.org.cn/2017/specimen.php?id=18102012
S146	Piper kadsura	Nanren village, Baoli Town, Longsheng County, Guilin City, Guangxi Province, China ‌	109.849	25.8532	National Specimen Information Infrastructure	http://www.nsii.org.cn/2017/specimen.php?id=16940745
S147	Piper kadsura	Meidong village, Baoli Town, Longsheng County, Guilin City, Guangxi Province, China ‌	109.764	25.8317	National Specimen Information Infrastructure	http://www.nsii.org.cn/2017/specimen.php?id=18102013
S148	Piper kadsura	Meidong village, Baoli Town, Longsheng County, Guilin City, Guangxi Province, China ‌	109.764	25.8317	National Specimen Information Infrastructure	http://www.nsii.org.cn/2017/specimen.php?id=16940746
S149	Piper kadsura	Hengxian County, Guangxi Province, China ‌	109.282	22.6931	National Specimen Information Infrastructure	http://www.nsii.org.cn/2017/specimen.php?id=5064924
S150	Piper kadsura	Liutianping, Daming Mountain, Wuming County, Guangxi Province, China ‌	108.394	23.5205	National Specimen Information Infrastructure	http://www.nsii.org.cn/2017/specimen.php?id=16434151
S151	Piper kadsura	Yuntai Mountain, Shibing County, Qiandongnan Miao and Dong Autonomous Prefecture, Guizhou Province, China ‌	108.12	27.1091	National Specimen Information Infrastructure	http://www.nsii.org.cn/2017/specimen.php?id=20322216
S152	Piper kadsura	Longhu Mountain Reserve, Longan County, Nanning City, Guangxi Province, China ‌	107.665	22.972	National Specimen Information Infrastructure	http://www.nsii.org.cn/2017/specimen.php?id=16434165
S153	Piper kadsura	Longhu Mountain scenic spot, Pingshan Township, Longan County, Nanning, Guangxi Province, China ‌	107.642	22.9669	National Specimen Information Infrastructure	http://www.nsii.org.cn/2017/specimen.php?id=19620708
S154	Piper kadsura	Pingshan Tunnel, Pingshan Town, Longan County, Nanning City, Guangxi Province, China ‌	107.579	22.9571	National Specimen Information Infrastructure	http://www.nsii.org.cn/2017/specimen.php?id=19620707
S155	Piper kadsura	Pingshan Tunnel, Pingshan Town, Longan County, Guangxi Province, China ‌	107.579	22.9571	National Specimen Information Infrastructure	http://www.nsii.org.cn/2017/specimen.php?id=18104238
S156	Piper kadsura	Xianyuan Valley, Pingshan Township, Longan County, Nanning City, Guangxi Province, China ‌	107.575	22.945	National Specimen Information Infrastructure	http://www.nsii.org.cn/2017/specimen.php?id=18104240
S157	Piper kadsura	Xianyuan Valley, Pingshan Township, Longan County, Nanning City, Guangxi Province, China ‌	107.575	22.945	National Specimen Information Infrastructure	http://www.nsii.org.cn/2017/specimen.php?id=19620706
S158	Piper kadsura	Xianyuan Valley, Pingshan Township, Longan County, Nanning City, Guangxi Province, China ‌	107.575	22.945	National Specimen Information Infrastructure	http://www.nsii.org.cn/2017/specimen.php?id=18104239
S159	Piper kadsura	Nonggang station, Nonggang Reserve, Longzhou County, Guangxi Province, China ‌	106.967	22.4737	National Specimen Information Infrastructure	http://www.nsii.org.cn/2017/specimen.php?id=16434167
S160	Piper kadsura	No. 55-1 boundary monument, Three Gorges, Nonggang Reserve, Longzhou County, Guangxi Province, China ‌	106.967	22.4737	National Specimen Information Infrastructure	http://www.nsii.org.cn/2017/specimen.php?id=16434166
S161	Piper kadsura	No. 55-2 boundary monument, Three Gorges, Nonggang Reserve, Longzhou County, Guangxi Province, China ‌	106.967	22.4737	National Specimen Information Infrastructure	http://www.nsii.org.cn/2017/specimen.php?id=16434163
S162	Piper kadsura	Nonggang Reserve, Longzhou County, Guangxi Province, China ‌	106.967	22.4737	National Specimen Information Infrastructure	http://www.nsii.org.cn/2017/specimen.php?id=16434162
S163	Piper kadsura	Boundary Monument No. 41 within the Nonggang Nature Reserve Station in Longzhou County, Guangxi Province, China ‌	106.967	22.4737	National Specimen Information Infrastructure	http://www.nsii.org.cn/2017/specimen.php?id=16434161
S164	Piper kadsura	Boundary Monument No. 42 within the Nonggang Nature Reserve Station in Longzhou County, Guangxi Province, China ‌	106.967	22.4737	National Specimen Information Infrastructure	http://www.nsii.org.cn/2017/specimen.php?id=16434160
S165	Piper kadsura	Nonggang Reserve, Longzhou County, Guangxi Province, China ‌	106.967	22.4737	National Specimen Information Infrastructure	http://www.nsii.org.cn/2017/specimen.php?id=16434159
S166	Piper kadsura	Nonggang Reserve, Longzhou County, Guangxi Province, China ‌	106.967	22.4737	National Specimen Information Infrastructure	http://www.nsii.org.cn/2017/specimen.php?id=16434158
S167	Piper kadsura	Nonggang Station, Nonggang Protection Area, Longzhou County, Guangxi Province, China ‌	106.967	22.4737	National Specimen Information Infrastructure	http://www.nsii.org.cn/2017/specimen.php?id=16434157
S168	Piper kadsura	Nonggang Station, Nonggang Protection Area, Longzhou County, Guangxi Province, China ‌	106.967	22.4737	National Specimen Information Infrastructure	http://www.nsii.org.cn/2017/specimen.php?id=16434156
S169	Piper kadsura	Mother-emperor plot, Nonggang Conservation Area, Longzhou County, Guangxi Province, China ‌	106.967	22.4737	National Specimen Information Infrastructure	http://www.nsii.org.cn/2017/specimen.php?id=16434155
S170	Piper kadsura	Mother-emperor plot, Nonggang Conservation Area, Longzhou County, Guangxi Province, China ‌	106.967	22.4737	National Specimen Information Infrastructure	http://www.nsii.org.cn/2017/specimen.php?id=16434154
S171	Piper kadsura	Mother-emperor plot, Nonggang Conservation Area, Longzhou County, Guangxi Province, China ‌	106.967	22.4737	National Specimen Information Infrastructure	http://www.nsii.org.cn/2017/specimen.php?id=16434153
S172	Piper kadsura	Nonggang Reserve, Longzhou County, Guangxi Province, China ‌	106.967	22.4737	National Specimen Information Infrastructure	http://www.nsii.org.cn/2017/specimen.php?id=16434152
S173	Piper kadsura	Minqiang Station, Nonggang Nature Reserve, Longzhou County, Guangxi Province, China ‌	106.967	22.4737	National Specimen Information Infrastructure	http://www.nsii.org.cn/2017/specimen.php?id=16434149
S174	Piper kadsura	Longzhou County, Guangxi Province, China ‌	106.861	22.3483	National Specimen Information Infrastructure	http://www.nsii.org.cn/2017/specimen.php?id=16434164
S175	Piper kadsura	Suspension bridge village, Bainan Township, Napo County, Guangxi Province, China ‌	105.821	23.0609	National Specimen Information Infrastructure	http://www.nsii.org.cn/2017/specimen.php?id=17555764
S176	Piper kadsura	Diyan Village, Longlin County, Guangxi Province, China ‌	105.612	24.5699	National Specimen Information Infrastructure	http://www.nsii.org.cn/2017/specimen.php?id=20224165
S177	Piper kadsura	Bijie Prefecture, Guizhou Province, China ‌	105.299	27.2902	National Specimen Information Infrastructure	http://www.nsii.org.cn/2017/specimen.php?id=20383103
S178	Piper kadsura	Bijie Prefecture, Guizhou Province, China ‌	105.299	27.2902	National Specimen Information Infrastructure	http://www.nsii.org.cn/2017/specimen.php?id=20383102
S179	Piper kadsura	Bijie Prefecture, Guizhou Province, China ‌	105.299	27.2902	National Specimen Information Infrastructure	http://www.nsii.org.cn/2017/specimen.php?id=20380663
S180	Piper kadsura	Xinxing village, Pugu Township, Pan County, Guizhou Province, China ‌	104.693	26.0571	National Specimen Information Infrastructure	http://www.nsii.org.cn/2017/specimen.php?id=18862446
S181	Piper kadsura	Xinxing village, Pugu Township, Pan County, Guizhou Province, China ‌	104.693	26.0571	National Specimen Information Infrastructure	http://www.nsii.org.cn/2017/specimen.php?id=18862447
S182	Piper kadsura	Zhongfeng Temple in Emei, Sichuan Province, China ‌	103.412	29.5741	National Specimen Information Infrastructure	http://www.nsii.org.cn/2017/specimen.php?id=19879138
S183	Piper kadsura	Emei Mountain, Leshan City, Sichuan Province, China ‌	103.356	29.5738	National Specimen Information Infrastructure	http://www.nsii.org.cn/2017/specimen.php?id=19879137
S184	Piper kadsura	Emei Mountain, Leshan City, Sichuan Province, China ‌	103.356	29.5738	National Specimen Information Infrastructure	http://www.nsii.org.cn/2017/specimen.php?id=19879140
S185	Piper kadsura	Emei Mountain, Leshan City, Sichuan Province, China ‌	103.356	29.5738	National Specimen Information Infrastructure	http://www.nsii.org.cn/2017/specimen.php?id=19879141
S186	Piper kadsura	Jinping Miao, Yao, and Dai Autonomous County, Yunnan Province, China ‌	103.232	22.7856	National Specimen Information Infrastructure	http://www.nsii.org.cn/2017/specimen.php?id=17295970
S187	Piper kadsura	Simao County, Yunnan Province, China ‌	100.976	22.7897	National Specimen Information Infrastructure	http://www.nsii.org.cn/2017/specimen.php?id=6551216
S188	Piper kadsura	Simao County, Yunnan Province, China ‌	100.976	22.7897	National Specimen Information Infrastructure	http://www.nsii.org.cn/2017/specimen.php?id=6551218
S189	Piper kadsura	Sichuan Province (Yushan Pass?), China ‌	N/A	N/A	National Specimen Information Infrastructure	http://www.nsii.org.cn/2017/specimen.php?id=14850960
S190	Piper kadsura	Jinggangshan City, Jiangxi Province , China ‌*****	N/A	N/A	National Specimen Information Infrastructure	http://www.nsii.org.cn/2017/specimen.php?id=15597300
S191	Piper kadsura	Nanping City, Fujian Province , China ‌****	N/A	N/A	National Specimen Information Infrastructure	http://www.nsii.org.cn/2017/specimen.php?id=15597253
S192	Piper kadsura	Nanping City, Fujian Province , China ‌****	N/A	N/A	National Specimen Information Infrastructure	http://www.nsii.org.cn/2017/specimen.php?id=15597256
S193	Piper kadsura	Nanping City, Fujian Province, China ‌ ****	N/A	N/A	National Specimen Information Infrastructure	http://www.nsii.org.cn/2017/specimen.php?id=15597257
S194	Piper kadsura	Nanping City, Fujian Province , China ‌****	N/A	N/A	National Specimen Information Infrastructure	http://www.nsii.org.cn/2017/specimen.php?id=15597258
S195	Piper kadsura	Jian 'ou City, Fujian Province, China ‌ ****	N/A	N/A	National Specimen Information Infrastructure	http://www.nsii.org.cn/2017/specimen.php?id=15597251
S196	Piper kadsura	** Xiancheng in Fujian Province, China ‌	N/A	N/A	National Specimen Information Infrastructure	http://www.nsii.org.cn/2017/specimen.php?id=15597261
S197	Piper kadsura	Fu 'an City, Fujian Province , China ‌**	N/A	N/A	National Specimen Information Infrastructure	http://www.nsii.org.cn/2017/specimen.php?id=15597255
S198	Piper kadsura	Da 'an City, Fujian Province , China ‌**	N/A	N/A	National Specimen Information Infrastructure	http://www.nsii.org.cn/2017/specimen.php?id=15597259
S199	Piper kadsura	Taiwan Province, China ‌	N/A	N/A	National Specimen Information Infrastructure	http://www.nsii.org.cn/2017/specimen.php?id=6551226
S200	Piper kadsura	Taiwan Province, China ‌	N/A	N/A	National Specimen Information Infrastructure	http://www.nsii.org.cn/2017/specimen.php?id=6550795
S201	Piper kadsura	Taishun County, Zhejiang Province, China ‌	N/A	N/A	National Specimen Information Infrastructure	http://www.nsii.org.cn/2017/specimen.php?id=2397531
S202	Piper kadsura	Tiaoyuan County, Taiwan Province, China ‌	N/A	N/A	National Specimen Information Infrastructure	http://www.nsii.org.cn/2017/specimen.php?id=4784326
S203	Piper kadsura	Hangzhou City, Zhejiang Province, China ‌	N/A	N/A	National Specimen Information Infrastructure	http://www.nsii.org.cn/2017/specimen.php?id=2541180
S204	Piper kadsura	Qingyun Cave, Star village, Wuyishan City, Fujian Province, China ‌	117.929618	27.6437	National Plant Specimen Resource Center	https://www.cvh.ac.cn/spms/detail.php?id=007670d6
S205	Piper kadsura	Neiliang Township, Dayu County, Ganzhou City, Jiangxi Province, China ‌	114.092	25.3952	National Plant Specimen Resource Center	https://www.cvh.ac.cn/spms/detail.php?id=ffdeace1
S206	Piper kadsura	Zhujiajian Street, Zhoushan City, Zhejiang Province, China ‌	122.833	29.8333	National Plant Specimen Resource Center	https://www.cvh.ac.cn/spms/detail.php?id=dc0f8ba8
S207	Piper kadsura	Beside the road of Putuo Mountain, Zhejiang Province, China ‌	122.39	29.9896	National Plant Specimen Resource Center	https://www.cvh.ac.cn/spms/detail.php?id=fc2bf438
S208	Piper kadsura	Putuo Island, Putuo District, Zhoushan City, Zhejiang Province, China ‌	122.386	30.9944	National Plant Specimen Resource Center	https://www.cvh.ac.cn/spms/detail.php?id=eec287aa
S209	Piper kadsura	Putuo Island, Putuo District, Zhoushan City, Zhejiang Province, China ‌	122.386	30.9908	National Plant Specimen Resource Center	https://www.cvh.ac.cn/spms/detail.php?id=f151603e
S210	Piper kadsura	Zhujiajian Street, Putuo District, Zhoushan City, Zhejiang Province, China ‌	122.386	30.9908	National Plant Specimen Resource Center	https://www.cvh.ac.cn/spms/detail.php?id=1fe07b21
S211	Piper kadsura	Foding Mountain, Putuo Mountain Scenic area, Zhejiang Province, China ‌	122.352	30.0342	National Plant Specimen Resource Center	https://www.cvh.ac.cn/spms/detail.php?id=db9578ae
S212	Piper kadsura	Peach blossom Island, Putuo District, Zhejiang Province, China ‌	122.217	29.7667	National Plant Specimen Resource Center	https://www.cvh.ac.cn/spms/detail.php?id=fc2bf6b6
S213	Piper kadsura	ChinyangVillage, Nanao County, Taiwan Province, China ‌	121.721	24.425	National Plant Specimen Resource Center	https://www.cvh.ac.cn/spms/detail.php?id=ec56f956
S214	Piper kadsura	7.5km away from the mileage mark of Hepinglin Road, Xiulin Township, Hualien County, Taiwan Province, China ‌	121.718	24.3208	National Plant Specimen Resource Center	https://www.cvh.ac.cn/spms/detail.php?id=eb432208
S215	Piper kadsura	Lanyu Township, Taitung County, Taiwan Province, China ‌	121.551	22.0367	National Plant Specimen Resource Center	https://www.cvh.ac.cn/spms/detail.php?id=ef2f00be
S216	Piper kadsura	Taitung County, Taiwan Province, China ‌	121.162	22.754	National Plant Specimen Resource Center	https://www.cvh.ac.cn/spms/detail.php?id=c2312da8
S217	Piper kadsura	Yangmingshan Scout Camping Area Nalt.500 m. In a broadleaf forest, Taipei City, Taiwan Province, China ‌	121.533	25.15	National Plant Specimen Resource Center	https://www.cvh.ac.cn/spms/detail.php?id=c23147af
S218	Piper kadsura	Yangmingshan National Park, from the parking lot of Datun Natural Park to Erziping , Taipei City, Taiwan Province,China ‌	121.525	25.1833	National Plant Specimen Resource Center	https://www.cvh.ac.cn/spms/detail.php?id=e9de28e1
S219	Piper kadsura	Yangming Mountain, Taipei City, Taiwan Province, China ‌	121.523	25.1825	National Plant Specimen Resource Center	https://www.cvh.ac.cn/spms/detail.php?id=f0375b04
S220	Piper kadsura	Taoyuan Township, Taoyuan County, Taiwan Province, China ‌	121.361	24.8174	National Plant Specimen Resource Center	https://www.cvh.ac.cn/spms/detail.php?id=c2307152
S221	Piper kadsura	Three Gorges District, New Taipei City, Taiwan Province, China ‌	121.383	24.93	National Plant Specimen Resource Center	https://www.cvh.ac.cn/spms/detail.php?id=f103831b
S222	Piper kadsura	This was the last time Faarie collected plants in the moat, dying about 15 years ago. In 1915, it was presented by Professor Onkes A mes to Olde Botanical Garden, Hualien County, Taiwan Province, China ‌	121.365	23.5925	National Plant Specimen Resource Center	https://www.cvh.ac.cn/spms/detail.php?id=00759c4b
S223	Piper kadsura	Taoyuan Township, Taoyuan County, Taiwan Province, China ‌	121.311	24.9972	National Plant Specimen Resource Center	https://www.cvh.ac.cn/spms/detail.php?id=f2d72de5
S224	Piper kadsura	Butterfly Valley, Hualien County, Taiwan Province, China ‌	121.358	23.5915	National Plant Specimen Resource Center	https://www.cvh.ac.cn/spms/detail.php?id=f10380e5
S225	Piper kadsura	On the road from Kuelin to Chilai, Xiulin Township, Hualien County, Taiwan Province, China ‌	121.631	23.9941	National Plant Specimen Resource Center	https://www.cvh.ac.cn/spms/detail.php?id=e9de27d0
S226	Piper kadsura	Dadongxian Reserve, Taiwan Province, China ‌	121.161	22.194	National Plant Specimen Resource Center	https://www.cvh.ac.cn/spms/detail.php?id=08ac27a7
S227	Piper kadsura	Mei Peak, Renai Township, Nantou County, Taiwan Province, China ‌	121.128	24.0243	National Plant Specimen Resource Center	https://www.cvh.ac.cn/spms/detail.php?id=00766cfc
S228	Piper kadsura	South Bank Tourist Center of Yushan National Park, Hualien County, Taiwan Province, China ‌	121.044	23.4477	National Plant Specimen Resource Center	https://www.cvh.ac.cn/spms/detail.php?id=e9de285a
S229	Piper kadsura	Lucia home - Tanan Nan Taitung County, Taiwan Province, China ‌	121.199	22.8465	National Plant Specimen Resource Center	https://www.cvh.ac.cn/spms/detail.php?id=cbd08f95
S230	Piper kadsura	Luxi Island, Dongtou County, Wenzhou City, Zhejiang Province, China ‌	121.226	27.9904	National Plant Specimen Resource Center	https://www.cvh.ac.cn/spms/detail.php?id=eecbcb06
S231	Piper kadsura	Hsinchu City, Taiwan Province, China ‌	121.009	24.8295	National Plant Specimen Resource Center	https://www.cvh.ac.cn/spms/detail.php?id=00766f2a
S232	Piper kadsura	Lucia home - Tanan Nan Taitung County, Taiwan Province, China ‌	121.147	22.758	National Plant Specimen Resource Center	https://www.cvh.ac.cn/spms/detail.php?id=eb5abe1a
S233	Piper kadsura	Taitung County, Taiwan Province, China ‌	121.199	22.8465	National Plant Specimen Resource Center	https://www.cvh.ac.cn/spms/detail.php?id=00766d86
S234	Piper kadsura	On the way from the entrance to the workers' dormitory in Taiwan Cycas Nature Reserve, Yanping Township, Taitung County, Taiwan Province, China ‌	121.199	22.8465	National Plant Specimen Resource Center	https://www.cvh.ac.cn/spms/detail.php?id=e9de2966
S235	Piper kadsura	Yuchi Township, Nantou County, Taiwan Province, China ‌	120.933	23.8996	National Plant Specimen Resource Center	https://www.cvh.ac.cn/spms/detail.php?id=f2d72e6a
S236	Piper kadsura	Xiangqiao Bay in Kenting National Park, Pingtung County, Taiwan Province, China ‌	120.79	21.9514	National Plant Specimen Resource Center	https://www.cvh.ac.cn/spms/detail.php?id=ffdea3a0
S237	Piper kadsura	Miaoli County, Taiwan Province, China ‌	120.817	24.5673	National Plant Specimen Resource Center	https://www.cvh.ac.cn/spms/detail.php?id=f2d72d5d
S238	Piper kadsura	Taichung City, Taiwan Province, China ‌	120.683	24.1858	National Plant Specimen Resource Center	https://www.cvh.ac.cn/spms/detail.php?id=c2312d08
S239	Piper kadsura	Taichung City, Taiwan Province, China ‌	120.701	23.9063	National Plant Specimen Resource Center	https://www.cvh.ac.cn/spms/detail.php?id=c230cfc2
S240	Piper kadsura	Tianxin Road, Wuyi Town, Wuyishan City, Fujian Province, China ‌	118.002	27.6924	National Plant Specimen Resource Center	https://www.cvh.ac.cn/spms/detail.php?id=00767301
S241	Piper kadsura	Tongbai Baizhang Pit, Tiantai Mountain, Taizhou City, Zhejiang Province, China ‌	121.014	29.2213	National Plant Specimen Resource Center	https://www.cvh.ac.cn/spms/detail.php?id=e58bd0d6
S242	Piper kadsura	Sandimen Township, Pingtung County, Taiwan Province, China ‌	120.651	22.7191	National Plant Specimen Resource Center	https://www.cvh.ac.cn/spms/detail.php?id=f1038290
S243	Piper kadsura	Yinkeng village, Pingyang County, Zhejiang Province, China ‌	120.298	27.7016	National Plant Specimen Resource Center	https://www.cvh.ac.cn/spms/detail.php?id=dba2c0c9
S244	Piper kadsura	Large stone, Juxi Town, Cangnan County, Wenzhou, Zhejiang Province, China ‌	120.201	27.5075	National Plant Specimen Resource Center	https://www.cvh.ac.cn/spms/detail.php?id=dba2c848
S245	Piper kadsura	Yacheng, Xiapu County, Ningde City, Fujian Province, China ‌	120.201	26.9866	National Plant Specimen Resource Center	https://www.cvh.ac.cn/spms/detail.php?id=f5c3004b
S246	Piper kadsura	Juxi Town, Cangnan County, Wenzhou City, Zhejiang Province, China ‌	120.19	27.5048	National Plant Specimen Resource Center	https://www.cvh.ac.cn/spms/detail.php?id=dc270abb
S247	Piper kadsura	Hangzhou Botanical Garden, China ‌	120.125	30.2598	National Plant Specimen Resource Center	https://www.cvh.ac.cn/spms/detail.php?id=e4e19221
S248	Piper kadsura	Siqian village, Taishun County, Wenzhou City, Zhejiang Province, China ‌	119.772	27.7602	National Plant Specimen Resource Center	https://www.cvh.ac.cn/spms/detail.php?id=dbacd8e6
S249	Piper kadsura	Banling village, Taishun County, Wenzhou, Zhejiang Province, China ‌	120.229	27.4603	National Plant Specimen Resource Center	https://www.cvh.ac.cn/spms/detail.php?id=db957db2
S250	Piper kadsura	Xinping village, Tuorong County, Fujian Province, China ‌	119.452	26.6977	National Plant Specimen Resource Center	https://www.cvh.ac.cn/spms/detail.php?id=f5c2f984
S251	Piper kadsura	Half Moon Village, Xinan Town, Xiapu County, Fujian Province, China ‌	119.717	26.9286	National Plant Specimen Resource Center	https://www.cvh.ac.cn/spms/detail.php?id=f5c2fa22
S252	Piper kadsura	Saiqi town, Fuan city, Fujian Province, China ‌	119.685	26.9655	National Plant Specimen Resource Center	https://www.cvh.ac.cn/spms/detail.php?id=0076738c
S253	Piper kadsura	Jialing Keng, Fuan County, Fujian Province, China ‌	119.678	27.3405	National Plant Specimen Resource Center	https://www.cvh.ac.cn/spms/detail.php?id=f5c2fc94
S254	Piper kadsura	Pingcheng Commune, Xiapu County, Ningde City, Fujian Province, China ‌	119.621	26.9286	National Plant Specimen Resource Center	https://www.cvh.ac.cn/spms/detail.php?id=f5c2f8e7
S255	Piper kadsura	Mashan Village, Xitan Town, Fuan City, Ningde City, Fujian Province, China ‌	119.633	27.0505	National Plant Specimen Resource Center	https://www.cvh.ac.cn/spms/detail.php?id=f5c3052f
S256	Piper kadsura	Changhua Town, Lin 'an City, Hangzhou City, Zhejiang Province, China ‌	119.224	30.1686	National Plant Specimen Resource Center	https://www.cvh.ac.cn/spms/detail.php?id=e58bd039
S257	Piper kadsura	Linqi town, Chun 'an County, Hangzhou City, Zhejiang Province, China ‌	119.127	29.8532	National Plant Specimen Resource Center	https://www.cvh.ac.cn/spms/detail.php?id=dc27034c
S258	Piper kadsura	Suichang County, Zhejiang Province, China ‌	119.282	28.5985	National Plant Specimen Resource Center	https://www.cvh.ac.cn/spms/detail.php?id=dbc60d26
S259	Piper kadsura	Pingcheng Commune, Xiapu County, Ningde City, Fujian Province, China ‌	119.068	26.9286	National Plant Specimen Resource Center	https://www.cvh.ac.cn/spms/detail.php?id=f5c2fbf7
S260	Piper kadsura	Shuiyue Xikeng, Xiapu County, Ningde City, Fujian Province, China ‌	119.017	26.9286	National Plant Specimen Resource Center	https://www.cvh.ac.cn/spms/detail.php?id=f5c2ffaf
S261	Piper kadsura	Xuanyan Brigade, Zhenmao Commune, Songzheng County, Fujian Province, China ‌	118.992	27.33	National Plant Specimen Resource Center	https://www.cvh.ac.cn/spms/detail.php?id=f5c2fe6b
S262	Piper kadsura	Fangcun District, Guangdong Province, China ‌	113.243	23.1042	National Plant Specimen Resource Center	https://www.cvh.ac.cn/spms/detail.php?id=c3c1d93c
S263	Piper kadsura	Jian Xiwan forest nature reserve,Wuyi Mountain, Fujian Province, China ‌	118.155	27.051	National Plant Specimen Resource Center	https://www.cvh.ac.cn/spms/detail.php?id=00767161
S264	Piper kadsura	Guangtiao Fuxia Zhengtian logging field and ridge of Wuyishan Nature Reserve, Wuyishan City, Fujian province, China ‌	118.094	27.9636	National Plant Specimen Resource Center	https://www.cvh.ac.cn/spms/detail.php?id=f5c30220
S265	Piper kadsura	Chengguan Town, Xiapu County, Ningde City, Fujian Province, China ‌	119.991	26.8835	National Plant Specimen Resource Center	https://www.cvh.ac.cn/spms/detail.php?id=f5c305cc
S266	Piper kadsura	Tingxi Town, Tongan District, Xiamen City, Fujian Province, China ‌	118.068	24.4461	National Plant Specimen Resource Center	https://www.cvh.ac.cn/spms/detail.php?id=f5c2fb5b
S267	Piper kadsura	Tianma Mountain, Putian City, Fujian Province, China ‌	117.966	27.6778	National Plant Specimen Resource Center	https://www.cvh.ac.cn/spms/detail.php?id=00767418
S268	Piper kadsura	Wuyuan County, Jiangxi Province, China ‌	117.946	29.4178	National Plant Specimen Resource Center	https://www.cvh.ac.cn/spms/detail.php?id=732e1ad4
S269	Piper kadsura	Tianyou Peak, Wuyishan Scenic Area, Wuyishan City, Fujian Province, China ‌	117.946	27.1167	National Plant Specimen Resource Center	https://www.cvh.ac.cn/spms/detail.php?id=73cff855
S270	Piper kadsura	Wuyishan Natural Scenic Area, Wuyishan City, Fujian Province, China ‌	117.963	27.6587	National Plant Specimen Resource Center	https://www.cvh.ac.cn/spms/detail.php?id=f093197e
S271	Piper kadsura	Cheng Weir Stream, Xing Cun Commune, Chun 'an County, Fujian Province, China ‌	117.867	27.7299	National Plant Specimen Resource Center	https://www.cvh.ac.cn/spms/detail.php?id=5751ecc6
S272	Piper kadsura	Huiwan pit, Wuyi Mountain Scenic Area, Chongan City, Fujian Province, China ‌	117.966	27.681	National Plant Specimen Resource Center	https://www.cvh.ac.cn/spms/detail.php?id=dc0a422e
S273	Piper kadsura	Lepaitu District, Hubozhai Nature Reserve, Nanjing County, Zhangzhou City, Fujian Province, China ‌	117.218	24.9111	National Plant Specimen Resource Center	https://www.cvh.ac.cn/spms/detail.php?id=72d8080e
S274	Piper kadsura	Longtan forest, Big Tangshan, Zixi County, Fuzhou City, Jiangxi Province, China ‌	117.15	27.704	National Plant Specimen Resource Center	https://www.cvh.ac.cn/spms/detail.php?id=51ded7bb
S275	Piper kadsura	Wenyu Brigade, Zhongzhong Commune, Longyan County, Fujian Province, China ‌	117.017	25.2	National Plant Specimen Resource Center	https://www.cvh.ac.cn/spms/detail.php?id=f5c2fabe
S276	Piper kadsura	Liu Likeng, Old Brigade of Houshi Commune, Longyan County, Fujian Province, China ‌	117.017	25.2	National Plant Specimen Resource Center	https://www.cvh.ac.cn/spms/detail.php?id=f5c2fdce
S277	Piper kadsura	Desheng Pass, Lichuan County, Jiangxi Province, China ‌	116.7	26.9833	National Plant Specimen Resource Center	https://www.cvh.ac.cn/spms/detail.php?id=ffde0853
S278	Piper kadsura	Yanquan Nature Reserve, Lichuan County, Jiangxi Province, China ‌	116.7	26.9833	National Plant Specimen Resource Center	https://www.cvh.ac.cn/spms/detail.php?id=f796c95e
S279	Piper kadsura	From Baizhangyan in Nanhe Town, Yingshan County, Huanggang City, Hubei Province, to Lejiashan, Leijiadian Town, Taojiahe Township, and Taohuachong, China ‌	115.632	30.5958	National Plant Specimen Resource Center	https://www.cvh.ac.cn/spms/detail.php?id=ccf98a6a
S280	Piper kadsura	Shima Lane, Qimu Peak, Qingguang Town, Changbu Town, Wuhua County, Guangdong Province, China ‌	115.391	23.833	National Plant Specimen Resource Center	https://www.cvh.ac.cn/spms/detail.php?id=c02a0a79
S281	Piper kadsura	Baiyun Mountain in Guangdong Province, China ‌	113.307	23.1912	National Plant Specimen Resource Center	https://www.cvh.ac.cn/spms/detail.php?id=c02a09dc
S282	Piper kadsura	Ziluo Mountain, Beidou Town, Taishan City, Guangdong Province, China ‌	112.355	21.8364	National Plant Specimen Resource Center	https://www.cvh.ac.cn/spms/detail.php?id=c3c21ff0
S283	Piper kadsura	Yangmingshan National Park in Taipei City, located in the central western part of the park, from Banboo Lake to Shuiwei. 620-700 Cryptomeria plantation, surrounded by grassy grasslands and remnants of broad-leaved secondary forests. The vine is about 15 meters long and wraps around the trunk of a withered tree in Taipei County, Taiwan Province, China ‌	111.922	26.1076	National Plant Specimen Resource Center	https://www.cvh.ac.cn/spms/detail.php?id=c3c230ae
S284	Piper kadsura	Yonghe River, Yunfu County, Guangdong Province, China ‌	111.53	22.7147	National Plant Specimen Resource Center	https://www.cvh.ac.cn/spms/detail.php?id=c02a0941
S285	Piper kadsura	Xiashi Cave, Xinyi City, Guangdong Province, China ‌	111.091	22.5375	National Plant Specimen Resource Center	https://www.cvh.ac.cn/spms/detail.php?id=c02a0ff7
S286	Piper kadsura	Liangshui wellhead, Guban Village, Baisha Town, Yangshuo County, Guangxi Province, China ‌	110.442	24.8028	National Plant Specimen Resource Center	https://www.cvh.ac.cn/spms/detail.php?id=20796b65
S287	Piper kadsura	West Mountain, Lingchuan county, Guangxi Province, China ‌	110.334	25.4153	National Plant Specimen Resource Center	https://www.cvh.ac.cn/spms/detail.php?id=c02a0e21
S288	Piper kadsura	Xida, Guangxi Zhuang Autonomous Protection Area, China ‌	110.312	25.083	National Plant Specimen Resource Center	https://www.cvh.ac.cn/spms/detail.php?id=c02a0ec0
S289	Piper kadsura	Luoxiang Township, Jinxiu Yao Autonomous County, Laibin City, Pingnan City, Zhuang Autonomous Region, Guangxi Province, China ‌	110.287	23.9423	National Plant Specimen Resource Center	https://www.cvh.ac.cn/spms/detail.php?id=c02a0806
S290	Piper kadsura	Dengcaotang village, Fengshan Town, Bobai County, Guangxi Zhuang Autonomous region, China ‌	110.013	22.0498	National Plant Specimen Resource Center	https://www.cvh.ac.cn/spms/detail.php?id=c02a0d85
S291	Piper kadsura	Nanren village, Baoli Town, Longsheng County, Guilin City, Guangxi Province, Guangxi Province, China ‌	109.9	25.8222	National Plant Specimen Resource Center	https://www.cvh.ac.cn/spms/detail.php?id=f1d54b41
S292	Piper kadsura	Meidong village, Baoli Township, Longsheng County, Guilin City, Guangxi Province, China ‌	109.758	25.8311	National Plant Specimen Resource Center	https://www.cvh.ac.cn/spms/detail.php?id=f8fd0173
S293	Piper kadsura	Chen Baiyan, Huaping Village, Longsheng County, Guilin City, Guangxi Province, China ‌	109.724	25.4833	National Plant Specimen Resource Center	https://www.cvh.ac.cn/spms/detail.php?id=f1dc3703
S294	Piper kadsura	DaFang Security village, Dabo Town, Rong 'an County, Guangxi Province, China ‌	109.532	25.1563	National Plant Specimen Resource Center	https://www.cvh.ac.cn/spms/detail.php?id=9c6741bd
S295	Piper kadsura	Yuntai Mountain, Shibing County, Qiandongnan Miao and Dong Autonomous Prefecture, Guizhou Province, China ‌	109.2	27.05	National Plant Specimen Resource Center	https://www.cvh.ac.cn/spms/detail.php?id=4ea50208
S296	Piper kadsura	Tarabadong town, Guizhou Province, China ‌	109.143	27.6498	National Plant Specimen Resource Center	https://www.cvh.ac.cn/spms/detail.php?id=20ac9786
S297	Piper kadsura	Longhu Mountain scenic spot, Pingshan Township, Longan County, Guangxi Province, China ‌	107.629	22.9608	National Plant Specimen Resource Center	https://www.cvh.ac.cn/spms/detail.php?id=77deb76a
S298	Piper kadsura	Pingshan Tunnel, Pingshan Town, Longan County, Guangxi Province, China ‌	107.566	22.9561	National Plant Specimen Resource Center	https://www.cvh.ac.cn/spms/detail.php?id=77deb616
S299	Piper kadsura	Xianyuan Valley, Pingshan Township, Longan County, Guangxi Province, China ‌	107.557	22.9431	National Plant Specimen Resource Center	https://www.cvh.ac.cn/spms/detail.php?id=77deb4d7
S300	Piper kadsura	Longhutou Longtan, Zhuang Autonomous Protection area, Guangxi Province,China	107.195	22.4344	National Plant Specimen Resource Center	https://www.cvh.ac.cn/spms/detail.php?id=c02a0f5c
S301	Piper kadsura	Across the mountain ditch from the suspension bridge in Southwest Township, Napo County, Guangxi Zhuang Autonomous Region, Guangxi Province, China ‌	106.541	22.9908	National Plant Specimen Resource Center	https://www.cvh.ac.cn/spms/detail.php?id=f67cbc16
S302	Piper kadsura	Dadi Tun, Diyan Village, Jianghe Township, Jianglin County, Guangxi Province, China ‌	105.621	24.5594	National Plant Specimen Resource Center	https://www.cvh.ac.cn/spms/detail.php?id=20200dfd
S303	Piper kadsura	Xinxing village, Pugu Township, Pan County, Guizhou Province, China ‌	104.672	26.0567	National Plant Specimen Resource Center	https://www.cvh.ac.cn/spms/detail.php?id=faa4f51d

## Sheet: Supplementary Table 2 
Supplementary Table 2. Distribution information of Piper kadsura excluding the duplicate points and unknown information points (89 samples).
Serial number	Species name	Location	Longitude(E)	Latitude (N)	Information Source (Platform)	Website
S1	Piper kadsura	Jinping Miao, Yao, and Dai Autonomous County, Yunnan Province, China	103.232	22.7856	National Specimen Information Infrastructure	http://www.nsii.org.cn/2017/specimen.php?id=17295970
S2	Piper kadsura	Emei Mountain, Leshan City, Sichuan Province, China	103.356	29.5738	National Specimen Information Infrastructure	http://www.nsii.org.cn/2017/specimen.php?id=19879137
S3	Piper kadsura	Zhongfeng Temple, Mount Emei, Sichuan Province, China	103.412	29.5741	National Specimen Information Infrastructure	http://www.nsii.org.cn/2017/specimen.php?id=19879138
S4	Piper kadsura	Xinxing village, Pugu Township, Pan County, Guizhou Province, China	104.693	26.0571	National Specimen Information Infrastructure	http://www.nsii.org.cn/2017/specimen.php?id=18862446
S5	Piper kadsura	Dadi Tun, Diyan Village, Jianghe Township, Jianglin County, Guangxi Province, China	105.612	24.5699	National Specimen Information Infrastructure	http://www.nsii.org.cn/2017/specimen.php?id=20224165
S6	Piper kadsura	Suspension bridge village, Bainan Township, Napo County, Guangxi Province, China	105.821	23.0609	National Specimen Information Infrastructure	http://www.nsii.org.cn/2017/specimen.php?id=17555764
S7	Piper kadsura	Nonggang station, Nonggang Reserve, Longzhou County, Guangxi Province, China	106.967	22.4737	National Specimen Information Infrastructure	http://www.nsii.org.cn/2017/specimen.php?id=16434167
S8	Piper kadsura	Longhutou Longtan, Guangxi Zhuang Autonomous Region, China	107.195	22.4344	National Plant Specimen Resource Center	https://www.cvh.ac.cn/spms/detail.php?id=c02a0f5c
S9	Piper kadsura	Xianyuan Valley, Pingshan Township, Longan County, Nanning City, Guangxi Province, China	107.575	22.945	National Specimen Information Infrastructure	http://www.nsii.org.cn/2017/specimen.php?id=18104240
S10	Piper kadsura	Pingshan Tunnel, Pingshan Town, Longan County, Nanning City, Guangxi Province, China	107.579	22.9571	National Specimen Information Infrastructure	http://www.nsii.org.cn/2017/specimen.php?id=19620707
S11	Piper kadsura	Longhu Mountain Scenic Area, Pingshan Township, Longan County, Nanning City, Guangxi Province, China	107.642	22.9669	National Specimen Information Infrastructure	http://www.nsii.org.cn/2017/specimen.php?id=19620708
S12	Piper kadsura	Yuntai Mountain, Shibing County, Qiandongnan Miao and Dong Autonomous Prefecture, Guizhou Province, China	108.12	27.1091	National Specimen Information Infrastructure	http://www.nsii.org.cn/2017/specimen.php?id=20322216
S13	Piper kadsura	Six days Ping, Daming Mountain, Wuming County, Guangxi Province, China	108.394	23.5205	National Specimen Information Infrastructure	http://www.nsii.org.cn/2017/specimen.php?id=16434151
S14	Piper kadsura	Tarabadong town, Guizhou Province, China	109.143	27.6498	National Plant Specimen Resource Center	https://www.cvh.ac.cn/spms/detail.php?id=20ac9786
S15	Piper kadsura	Dafang, Ping'an Village, Dapo Town, Rong'an County, Guangxi Province, China	109.532	25.1563	National Plant Specimen Resource Center	https://www.cvh.ac.cn/spms/detail.php?id=9c6741bd
S16	Piper kadsura	Meidong village, Baoli Township, Longsheng County, Guilin City, Guangxi Province, China	109.764	25.8317	National Specimen Information Infrastructure	http://www.nsii.org.cn/2017/specimen.php?id=18102013
S17	Piper kadsura	Nanren village, Baoli Town, Longsheng County, Guilin City, Guangxi Province, China	109.849	25.8532	National Specimen Information Infrastructure	http://www.nsii.org.cn/2017/specimen.php?id=18102012
S18	Piper kadsura	Huaping Nature Reserve, Longsheng County, Guangxi Province, China	109.92	25.6366	National Specimen Information Infrastructure	http://www.nsii.org.cn/2017/specimen.php?id=16943592
S19	Piper kadsura	Dengcaotang village, Fengshan Town, Bobai County, Guangxi Zhuang Autonomous region, China	110.013	22.0498	National Plant Specimen Resource Center	https://www.cvh.ac.cn/spms/detail.php?id=c02a0d85
S20	Piper kadsura	Luoxiang Township, Jinxiu Yao Autonomous County, Laibin City, Pingnan City, Zhuang Autonomous Region, Guangxi Province, China	110.287	23.9423	National Plant Specimen Resource Center	https://www.cvh.ac.cn/spms/detail.php?id=c02a0806
S21	Piper kadsura	Liangshui well, Guban Village, Baisha Town, Yangshuo County, Guilin City, Guangxi Province, China	110.455	24.8514	National Specimen Information Infrastructure	http://www.nsii.org.cn/2017/specimen.php?id=20008174
S22	Piper kadsura	Xiashi Cave, Xinyi City, Guangdong Province, China	111.091	22.5375	National Plant Specimen Resource Center	https://www.cvh.ac.cn/spms/detail.php?id=c02a0ff7
S23	Piper kadsura	Ziluo Mountain, Beidou Town, Taishan City, Guangdong Province, China	112.355	21.8364	National Plant Specimen Resource Center	https://www.cvh.ac.cn/spms/detail.php?id=c3c21ff0
S24	Piper kadsura	Fangcun District, Guangdong Province, China	113.243	23.1042	National Plant Specimen Resource Center	https://www.cvh.ac.cn/spms/detail.php?id=c3c1d93c
S25	Piper kadsura	Baiyun Mountain in Guangdong Province, China	113.307	23.1912	National Plant Specimen Resource Center	https://www.cvh.ac.cn/spms/detail.php?id=c02a09dc
S26	Piper kadsura	Neiliang Township, Dayu County, Ganzhou City, Jiangxi Province, China	114.092	25.3952	National Plant Specimen Resource Center	https://www.cvh.ac.cn/spms/detail.php?id=ffdeace1
S27	Piper kadsura	Qimu Zhang Shi Ma, Qingguangshe, Changbu Township, Wuhua County, Guangdong Province, China	115.391	23.833	National Plant Specimen Resource Center	https://www.cvh.ac.cn/spms/detail.php?id=c02a0a79
S28	Piper kadsura	Nanhe Town, Yingshan County, Huanggang City, Hubei Province, China	115.632	30.5958	National Plant Specimen Resource Center	https://www.cvh.ac.cn/spms/detail.php?id=ccf98a6a
S29	Piper kadsura	Yanquan Nature Reserve, Lichuan County, Jiangxi Province, China	115.777	27.2667	National Specimen Information Infrastructure	http://www.nsii.org.cn/2017/specimen.php?id=17934988
S30	Piper kadsura	Desheng Pass, Lichuan County, Jiangxi Province, China	117.024	27.1752	National Plant Specimen Resource Center	https://www.cvh.ac.cn/spms/detail.php?id=ffde0853
S31	Piper kadsura	Wenyu Brigade, Zhongzhong Township, Longyan County, Fujian Province, China	117.128	24.7936	National Specimen Information Infrastructure	http://www.nsii.org.cn/2017/specimen.php?id=17768271
S32	Piper kadsura	Dahoushan, Zixi County, Fuzhou City, Jiangxi Province, China	117.15	27.704	National Plant Specimen Resource Center	https://www.cvh.ac.cn/spms/detail.php?id=51ded7bb
S33	Piper kadsura	Letu Area, Huboliao Nature Reserve, Nanjing County, Zhangzhou City, Fujian Province, China	117.23	24.9108	National Specimen Information Infrastructure	http://www.nsii.org.cn/2017/specimen.php?id=19687395
S34	Piper kadsura	Nanjing County, Fujian Province, China	117.352	24.5178	National Specimen Information Infrastructure	http://www.nsii.org.cn/2017/specimen.php?id=15803315
S35	Piper kadsura	Chafu Xianyang logging field and valley, Guangze County, Nanping City, Fujian Province, China	117.431	27.7065	National Specimen Information Infrastructure	http://www.nsii.org.cn/2017/specimen.php?id=17768283
S36	Piper kadsura	Near Lijiapo, Huangkeng Town, Jianyang City, Fujian Province, China	117.588	27.606	National Specimen Information Infrastructure	http://www.nsii.org.cn/2017/specimen.php?id=20323782
S37	Piper kadsura	Wuyuan County, Shangrao City, Jiangxi Province, China	117.87	29.2515	National Specimen Information Infrastructure	http://www.nsii.org.cn/2017/specimen.php?id=19690288
S38	Piper kadsura	Xingcun Commune, Chong'an County (now Mount Wuyi City), Nanping City, Fujian Province, China	117.932	27.6401	National Specimen Information Infrastructure	http://www.nsii.org.cn/2017/specimen.php?id=20323783
S39	Piper kadsura	Tianyou Peak, Wuyishan Scenic Area, Wuyishan City, Fujian Province, China	117.959	27.6561	National Specimen Information Infrastructure	http://www.nsii.org.cn/2017/specimen.php?id=19694612
S40	Piper kadsura	Wuyishan Natural Scenic Area, Wuyishan City, Fujian Province, China	117.963	27.6587	National Plant Specimen Resource Center	https://www.cvh.ac.cn/spms/detail.php?id=f093197e
S41	Piper kadsura	Huiwan pit, Wuyi Mountain Scenic Area, Chongan City, Fujian Province, China	117.966	27.681	National Plant Specimen Resource Center	https://www.cvh.ac.cn/spms/detail.php?id=dc0a422e
S42	Piper kadsura	Tianma Mountain, Putian City, Fujian Province, China	117.966	27.6778	National Plant Specimen Resource Center	https://www.cvh.ac.cn/spms/detail.php?id=00767418
S43	Piper kadsura	Tianxin Road, Wuyi Town, Wuyishan City, Fujian Province, China	118.002	27.6924	National Plant Specimen Resource Center	https://www.cvh.ac.cn/spms/detail.php?id=00767301
S44	Piper kadsura	Tingxi Township, Tongan County, Fujian Province, China	118.137	24.7947	National Specimen Information Infrastructure	http://www.nsii.org.cn/2017/specimen.php?id=17768286
S45	Piper kadsura	Jianxi Wanmulin Nature Reserve, Wuyi Mountain in Fujian Province, China	118.155	27.051	National Plant Specimen Resource Center	https://www.cvh.ac.cn/spms/detail.php?id=00767161
S46	Piper kadsura	Baoyan Brigade, Zhenqian Commune, Songzheng County, Fujian Province (Baoyan Village, Zhenqian Town, Zhenghe County, Nanping City, Fujian Province), China	119.007	27.2766	National Specimen Information Infrastructure	http://www.nsii.org.cn/2017/specimen.php?id=17768277
S47	Piper kadsura	Linqi town, Chun 'an County, Hangzhou City, Zhejiang Province, China	119.127	29.8532	National Plant Specimen Resource Center	https://www.cvh.ac.cn/spms/detail.php?id=dc27034c
S48	Piper kadsura	Changhua Town, Lin 'an City, Hangzhou City, Zhejiang Province, China	119.224	30.1686	National Plant Specimen Resource Center	https://www.cvh.ac.cn/spms/detail.php?id=e58bd039
S49	Piper kadsura	Suichang County, Zhejiang Province, China	119.282	28.5985	National Plant Specimen Resource Center	https://www.cvh.ac.cn/spms/detail.php?id=dbc60d26
S50	Piper kadsura	Xinping, Tuorong County, Fujian Province, China	119.452	26.6977	National Plant Specimen Resource Center	https://www.cvh.ac.cn/spms/detail.php?id=f5c2f984
S51	Piper kadsura	Pingcheng Commune, Xiapu County, Ningde City, Fujian Province, China	119.621	26.9286	National Plant Specimen Resource Center	https://www.cvh.ac.cn/spms/detail.php?id=f5c2f8e7
S52	Piper kadsura	Mashan Village, Xitan Town, Fuan City, Ningde City, Fujian Province, China	119.633	27.0505	National Plant Specimen Resource Center	https://www.cvh.ac.cn/spms/detail.php?id=f5c3052f
S53	Piper kadsura	Siqian Commune, Taishun County, Wenzhou City, Zhejiang Province, China	119.772	27.7602	National Plant Specimen Resource Center	https://www.cvh.ac.cn/spms/detail.php?id=dbacd8e6
S54	Piper kadsura	Xianyang Village zero pit, Fuan County, Ningde City, Fujian Province, China	119.785	27.0189	National Specimen Information Infrastructure	http://www.nsii.org.cn/2017/specimen.php?id=17768274
S55	Piper kadsura	Half Moon Village, Xinan Town, Xiapu County, Fujian Province, China ‌	119.896	26.7566	National Specimen Information Infrastructure	http://www.nsii.org.cn/2017/specimen.php?id=17768284
S56	Piper kadsura	Zherong County, Ningde City, Fujian Province, China	119.907	27.24	National Specimen Information Infrastructure	http://www.nsii.org.cn/2017/specimen.php?id=17768269
S57	Piper kadsura	Chengguan, Xiapu County, Ningde City, Fujian Province, China	119.991	26.8835	National Plant Specimen Resource Center	https://www.cvh.ac.cn/spms/detail.php?id=f5c305cc
S58	Piper kadsura	Xikeng Village, Shimen She Nationality Township, Xiapu County, Ningde City, Fujian Province, China	120.082	26.9745	National Specimen Information Infrastructure	http://www.nsii.org.cn/2017/specimen.php?id=17768279
S59	Piper kadsura	Hangzhou Botanical Garden, China	120.125	30.2598	National Plant Specimen Resource Center	https://www.cvh.ac.cn/spms/detail.php?id=e4e19221
S60	Piper kadsura	Juxi Town, Cangnan County, Wenzhou City, Zhejiang Province, China	120.19	27.5048	National Plant Specimen Resource Center	https://www.cvh.ac.cn/spms/detail.php?id=dc270abb
S61	Piper kadsura	Yacheng commune, Xiapu County, Fujian Province, China	120.201	26.9867	National Specimen Information Infrastructure	http://www.nsii.org.cn/2017/specimen.php?id=17768275
S62	Piper kadsura	Fuding County Ningde City, Fujian Province, China	120.223	27.3305	National Specimen Information Infrastructure	http://www.nsii.org.cn/2017/specimen.php?id=17768288
S63	Piper kadsura	Banling village, Taishun County, Wenzhou, Zhejiang Province, China	120.229	27.4603	National Plant Specimen Resource Center	https://www.cvh.ac.cn/spms/detail.php?id=db957db2
S64	Piper kadsura	Yinkeng village, Pingyang County, Zhejiang Province, China	120.298	27.7016	National Plant Specimen Resource Center	https://www.cvh.ac.cn/spms/detail.php?id=dba2c0c9
S65	Piper kadsura	Baihe District, Tainan City, Taiwan Province, China	120.426	23.3572	National Specimen Information Infrastructure	http://www.nsii.org.cn/2017/specimen.php?id=18421831
S66	Piper kadsura	Sandimen Township, Pingtung County, Taiwan Province, China	120.651	22.7191	National Plant Specimen Resource Center	https://www.cvh.ac.cn/spms/detail.php?id=f1038290
S67	Piper kadsura	Taichung City, Taiwan Province, China	120.683	24.1858	National Plant Specimen Resource Center	https://www.cvh.ac.cn/spms/detail.php?id=c2312d08
S68	Piper kadsura	Kenting National Park, Pingtung County, Taiwan Province, China	120.79	21.9514	National Plant Specimen Resource Center	https://www.cvh.ac.cn/spms/detail.php?id=ffdea3a0
S69	Piper kadsura	Miaoli County, Taiwan Province, China	120.817	24.5673	National Plant Specimen Resource Center	https://www.cvh.ac.cn/spms/detail.php?id=f2d72d5d
S70	Piper kadsura	Yuchi Township, Nantou County, Taiwan Province, China	120.933	23.8996	National Plant Specimen Resource Center	https://www.cvh.ac.cn/spms/detail.php?id=f2d72e6a
S71	Piper kadsura	Hsinchu City, Taiwan Province, China	121.009	24.8295	National Plant Specimen Resource Center	https://www.cvh.ac.cn/spms/detail.php?id=00766f2a
S72	Piper kadsura	Tongbai Baizhang Pit, Tiantai Mountain, Taizhou City, Zhejiang Province, China	121.014	29.2213	National Plant Specimen Resource Center	https://www.cvh.ac.cn/spms/detail.php?id=e58bd0d6
S73	Piper kadsura	South Bank Tourist Center of Yushan National Park, Hualien County,Taiwan Province, China	121.044	23.4477	National Plant Specimen Resource Center	https://www.cvh.ac.cn/spms/detail.php?id=e9de285a
S74	Piper kadsura	Renai Township, Nantou County, Taiwan Province, China	121.128	24.0243	National Plant Specimen Resource Center	https://www.cvh.ac.cn/spms/detail.php?id=00766cfc
S75	Piper kadsura	Taitung County, Taiwan Province, China	121.147	22.758	National Plant Specimen Resource Center	https://www.cvh.ac.cn/spms/detail.php?id=eb5abe1a
S76	Piper kadsura	Dongtou County, Wenzhou City, Zhejiang Province, China	121.153	27.8395	National Specimen Information Infrastructure	http://www.nsii.org.cn/2017/specimen.php?id=15003892
S77	Piper kadsura	Luxi Island, Dongtou District, Wenzhou City, Zhejiang Province, China	121.226	27.9904	National Plant Specimen Resource Center	https://www.cvh.ac.cn/spms/detail.php?id=eecbcb06
S78	Piper kadsura	Taoyuan Township, Taoyuan County, Taiwan Province, China	121.311	24.9972	National Plant Specimen Resource Center	https://www.cvh.ac.cn/spms/detail.php?id=f2d72de5
S79	Piper kadsura	Three Gorges District, New Taipei City, Taiwan Province, China	121.383	24.93	National Plant Specimen Resource Center	https://www.cvh.ac.cn/spms/detail.php?id=f103831b
S80	Piper kadsura	Yangming Mountain, Taipei City, Taiwan Province, China	121.565	25.1498	National Specimen Information Infrastructure	http://www.nsii.org.cn/2017/specimen.php?id=15154152
S81	Piper kadsura	Hualien County, Taiwan Province, China	121.631	23.9941	National Plant Specimen Resource Center	https://www.cvh.ac.cn/spms/detail.php?id=e9de27d0
S82	Piper kadsura	Taohua Island, Putuo, Zhoushan City, Zhejiang Province, China	122.283	29.8206	National Specimen Information Infrastructure	http://www.nsii.org.cn/2017/specimen.php?id=18421837
S83	Piper kadsura	Putuo Island, Putuo District, Zhoushan City, Zhejiang Province, China	122.396	30.0062	National Specimen Information Infrastructure	http://www.nsii.org.cn/2017/specimen.php?id=15000048
S84	Piper kadsura	Putuo Mountain, Zhejiang Province, China	122.397	30.0161	National Specimen Information Infrastructure	http://www.nsii.org.cn/2017/specimen.php?id=16108240
S85	Piper kadsura	Garden of Huiji Temple, Putuo Mountain, Zhejiang Province, China	122.397	30.017	National Specimen Information Infrastructure	http://www.nsii.org.cn/2017/specimen.php?id=16108229
S86	Piper kadsura	Putuo Mountain Golden Beach, Zhejiang Province, China	122.397	29.9845	National Specimen Information Infrastructure	http://www.nsii.org.cn/2017/specimen.php?id=16108245
S87	Piper kadsura	Putuo Mountain, Zhoushan City, Zhejiang Province, China	122.398	30.008	National Specimen Information Infrastructure	http://www.nsii.org.cn/2017/specimen.php?id=18421833
S88	Piper kadsura	Zhujiajian Street, Putuo District, Zhoushan City, Zhejiang Province, China	122.4	29.9233	National Specimen Information Infrastructure	http://www.nsii.org.cn/2017/specimen.php?id=19849824
S89	Piper kadsura	Wanshan County, Tongren City, Guizhou Province, China	109.160316	27.677	National Specimen Information Infrastructure	http://www.nsii.org.cn/2017/specimen.php?id=20005715

## Sheet: Supplementary Table 3
Supplementary Table 3. Distribution information of Piper kadsura excluding overlapping points within 10km (65 samples).
species	longitude	latitude
Piper kadsura	103.232	22.7856
Piper kadsura	103.356	29.5738
Piper kadsura	104.693	26.0571
Piper kadsura	105.612	24.5699
Piper kadsura	105.821	23.0609
Piper kadsura	106.967	22.4737
Piper kadsura	107.195	22.4344
Piper kadsura	107.642	22.9669
Piper kadsura	108.12	27.1091
Piper kadsura	108.394	23.5205
Piper kadsura	109.532	25.1563
Piper kadsura	109.764	25.8317
Piper kadsura	109.92	25.6366
Piper kadsura	110.013	22.0498
Piper kadsura	110.287	23.9423
Piper kadsura	110.455	24.8514
Piper kadsura	111.091	22.5375
Piper kadsura	112.355	21.8364
Piper kadsura	113.243	23.1042
Piper kadsura	114.092	25.3952
Piper kadsura	115.391	23.833
Piper kadsura	115.632	30.5958
Piper kadsura	115.777	27.2667
Piper kadsura	117.024	27.1752
Piper kadsura	117.15	27.704
Piper kadsura	117.23	24.9108
Piper kadsura	117.352	24.5178
Piper kadsura	117.588	27.606
Piper kadsura	117.87	29.2515
Piper kadsura	117.932	27.6401
Piper kadsura	118.137	24.7947
Piper kadsura	118.155	27.051
Piper kadsura	119.007	27.2766
Piper kadsura	119.127	29.8532
Piper kadsura	119.224	30.1686
Piper kadsura	119.282	28.5985
Piper kadsura	119.452	26.6977
Piper kadsura	119.621	26.9286
Piper kadsura	119.772	27.7602
Piper kadsura	119.896	26.7566
Piper kadsura	119.907	27.24
Piper kadsura	120.125	30.2598
Piper kadsura	120.19	27.5048
Piper kadsura	120.201	26.9867
Piper kadsura	120.223	27.3305
Piper kadsura	120.298	27.7016
Piper kadsura	120.426	23.3572
Piper kadsura	120.651	22.7191
Piper kadsura	120.683	24.1858
Piper kadsura	120.79	21.9514
Piper kadsura	120.817	24.5673
Piper kadsura	120.933	23.8996
Piper kadsura	121.009	24.8295
Piper kadsura	121.014	29.2213
Piper kadsura	121.044	23.4477
Piper kadsura	121.128	24.0243
Piper kadsura	121.147	22.758
Piper kadsura	121.226	27.9904
Piper kadsura	121.311	24.9972
Piper kadsura	121.565	25.1498
Piper kadsura	121.631	23.9941
Piper kadsura	122.283	29.8206
Piper kadsura	122.397	30.0161
Piper kadsura	122.397	30.017
Piper kadsura	109.16	27.677
